# Supplementary material for: Genomic characterization of three novel Basilisk-like phages infecting Bacillus anthracis
Source: PubMed Central journal article supplement (PMC6145125; doi:10.1186/s12864-018-5056-4), 2018-09-18

Phages v\_B-Bak1, v\_B-Bak6, v\_B-Bak10 and Basilisk

A)

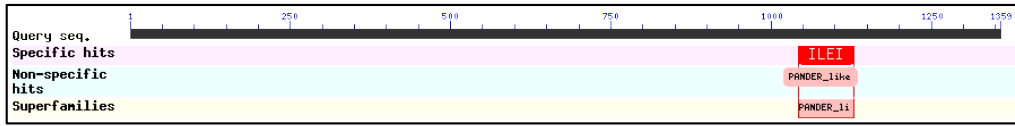

B)

Phage PBC4

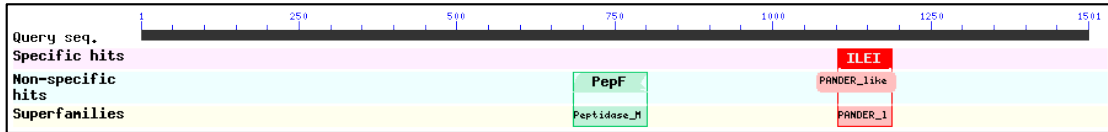

C)

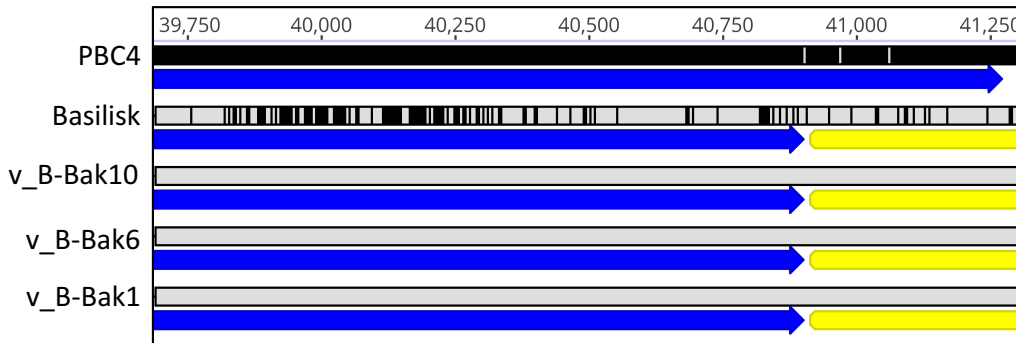

D)

Phages v\_B-Bak1, v\_B-Bak6, v\_B-Bak10 and Basilisk

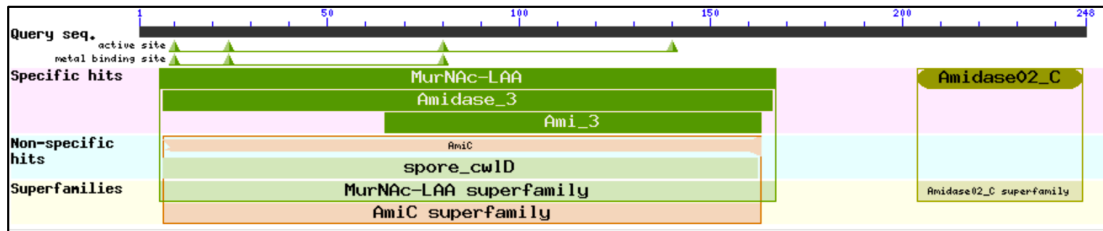

E)

Phage PBC4

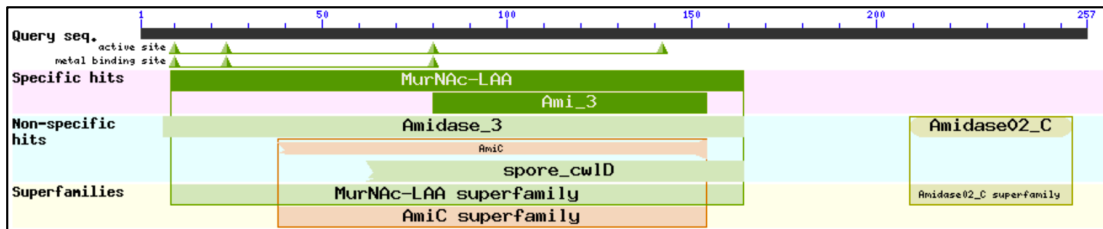

Supplement: 12864_2018_5056_MOESM6_ESM.pdf [file 12864_2018_5056_MOESM6_ESM.pdf]
