# Supplementary material for: Genomic characterization of three novel Basilisk-like phages infecting Bacillus anthracis
Source: PubMed Central journal article supplement (PMC6145125; doi:10.1186/s12864-018-5056-4), 2018-09-18

TMHMM posterior probabilities for test

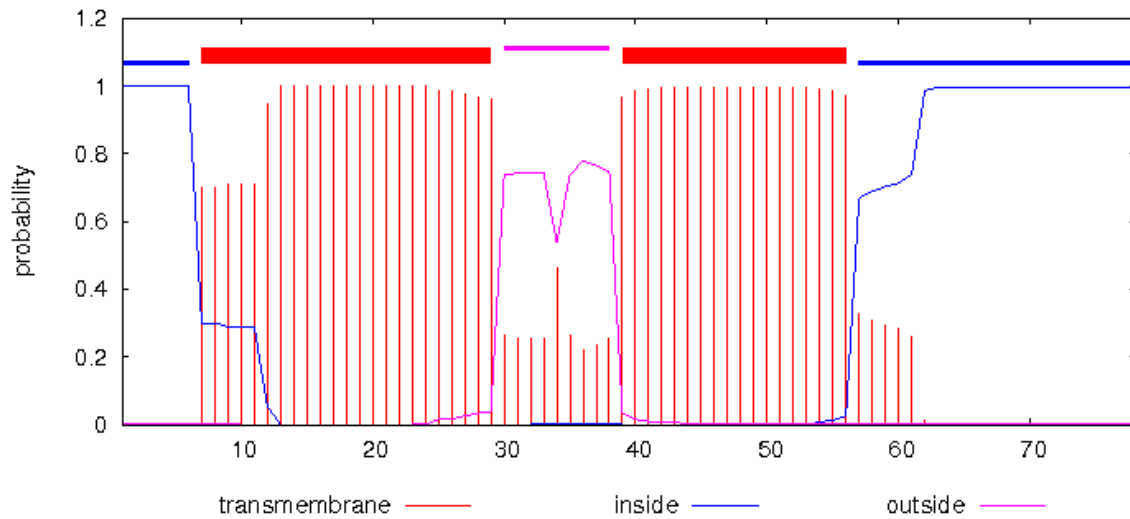

Supplement: 12864_2018_5056_MOESM7_ESM.pdf [file 12864_2018_5056_MOESM7_ESM.pdf]
