# Supplementary material for: Genomic characterization of three novel Basilisk-like phages infecting Bacillus anthracis
Source: PubMed Central journal article supplement (PMC6145125; doi:10.1186/s12864-018-5056-4), 2018-09-18
Supplement: 12864_2018_5056_MOESM10_ESM.pdf [file 12864_2018_5056_MOESM10_ESM.pdf]

|              |     |     |     |     |     |     |     |   |   |   |   |   |   |   |   |   |   |   |   |   |   |   |   |   |   |   |   |   |   |   |   |   |   |   |   |   |   |   |   |   |   |   |   |   |   |   |   |   |   |   |   |   |   |   |   |   |   |   |   |   |   |   |   |   |   |   |   |
|--------------|-----|-----|-----|-----|-----|-----|-----|---|---|---|---|---|---|---|---|---|---|---|---|---|---|---|---|---|---|---|---|---|---|---|---|---|---|---|---|---|---|---|---|---|---|---|---|---|---|---|---|---|---|---|---|---|---|---|---|---|---|---|---|---|---|---|---|---|---|---|---|
|              | 1   | 10  | 20  | 30  | 40  | 50  | 60  |   |   |   |   |   |   |   |   |   |   |   |   |   |   |   |   |   |   |   |   |   |   |   |   |   |   |   |   |   |   |   |   |   |   |   |   |   |   |   |   |   |   |   |   |   |   |   |   |   |   |   |   |   |   |   |   |   |   |   |   |
| 1. PBC4      | M   | E   | V   | L   | L   | M   | K   | G | I | L | L | T | Y | F | D | M | O | K | E | L | D | S | Y | I | A | G | R | G | L | I | L | T | E | R | L | S | L | M | K | R | T | F | A | A | M | V | E | F | T | E | C | A | N | D | H | O | E | S | F | K | D | W | K | P |   |   |   |
| 2. v_B-Bak10 | M   | E   | V   | L   | P   | M   | T   | N | T | I | N | L | K | E | L | F | D | I | Q | K | T | L | D | A | H | I | A | E | K | R | G | L | V | L | T | E | R | I | S | L | M | K | R | F | F | A | G | I | V | E | F | T | E | C | A | N | D | H | O | E | S | F | K | D | W | K | P |
| 3. Basilisk  | M   | E   | V   | L   | P   | M   | E   | N | T | I | N | L | K | E | L | F | D | I | Q | K | T | L | D | A | H | I | A | E | K | R | G | L | V | L | T | E | R | I | S | L | M | K | R | F | F | A | G | I | V | E | F | T | E | C | A | N | D | H | O | E | S | F | K | D | W | K | P |
| 4. v_B-Bak1  | M   | E   | V   | L   | P   | M   | E   | N | T | I | N | L | K | E | L | F | D | I | Q | K | T | L | D | A | H | I | A | E | K | R | G | L | V | L | T | E | R | I | S | L | M | K | R | F | F | A | G | I | V | E | F | T | E | C | A | N | D | H | O | E | S | F | K | D | W | K | P |
| 5. v_B-Bak6  | M   | E   | V   | L   | P   | M   | E   | N | T | I | N | L | K | E | L | F | D | I | Q | K | T | L | D | A | H | I | A | E | K | R | G | L | V | L | T | E | R | I | S | L | M | K | R | F | F | A | G | I | V | E | F | T | E | C | A | N | D | H | O | E | S | F | K | D | W | K | P |
|              | 70  | 80  | 90  | 100 | 110 | 120 | 130 |   |   |   |   |   |   |   |   |   |   |   |   |   |   |   |   |   |   |   |   |   |   |   |   |   |   |   |   |   |   |   |   |   |   |   |   |   |   |   |   |   |   |   |   |   |   |   |   |   |   |   |   |   |   |   |   |   |   |   |   |
| 1. PBC4      | N   | N   | O   | P   | K   | P   | T   | T | L | E | E | W | I | D | G | F | H | F | V | L | S | K | G | N | N | L | A | A | A | G | L | I | T | D | P | N | V | M | E | F | F | P | S | E | L | E | F | A | E | G | T | T | K | E | E | I | T | M | T | Y | F | V | N | S | L | A | L |
| 2. v_B-Bak10 | N   | N   | O   | P   | K   | P   | T   | T | L | E | E | Y | V | D | G | L | H | F | I | L | S | S | G | N | N | L | A | A | A | G | L | I | P | D | P | S | I | E | D | Y | L | P | M | V | K | D | F | A | K | G | T | G | K | D | E | I | V | M | T | Y | F | M | D | S | I | V | L |
| 3. Basilisk  | N   | N   | K   | P   | K   | P   | T   | T | L | E | E | Y | V | D | G | L | H | F | I | L | S | S | G | N | N | L | A | A | A | G | L | I | I | D | P | T | I | D | Y | L | P | I | V | L | E | F | N | E | E | T | G | Q | D | E | I | V | M | S | Y | F | T | N | A | I | A | L |   |
| 4. v_B-Bak1  | N   | N   | K   | P   | K   | P   | T   | T | L | E | E | Y | V | D | G | L | H | F | I | L | S | S | G | N | N | L | A | A | A | G | L | I | I | D | P | T | I | D | Y | L | P | I | V | L | E | F | N | E | E | T | G | Q | D | E | I | V | M | S | Y | F | T | N | A | I | A | L |   |
| 5. v_B-Bak6  | N   | N   | K   | P   | K   | P   | T   | T | L | E | E | Y | V | D | G | L | H | F | I | L | S | S | G | N | N | L | A | A | A | G | L | I | I | D | P | T | I | D | Y | L | P | I | V | L | E | F | N | E | E | T | G | Q | D | E | I | V | M | S | Y | F | T | N | A | I | A | L |   |
|              | 140 | 150 | 160 | 170 | 180 | 190 | 201 |   |   |   |   |   |   |   |   |   |   |   |   |   |   |   |   |   |   |   |   |   |   |   |   |   |   |   |   |   |   |   |   |   |   |   |   |   |   |   |   |   |   |   |   |   |   |   |   |   |   |   |   |   |   |   |   |   |   |   |   |
| 1. PBC4      | E   | L   | E   | L   | F   | T   | S   | L | Q | H | N | N | H | E | Y | I | Q | E | D | Y | Y | N | L | V | C | M | Y | L | G | L | A | K | N | L | G | F | N | L | E | D | I | K | A | A | Y | L | E | K | N | K | E | N | F | A | R | O | N | G | E | S | T | K | E | G | Y | E | A |
| 2. v_B-Bak10 | E   | V   | E   | L   | F   | T   | G   | L | Q | Q | D | E | K | E | Y | L | A | E | D | Y | H | E | L | V | C | T | Y | L | G | L | A | N | Q | I | G | F | T | P | E | E | I | V | A | A | Y | L | E | K | N | K | E | N | F | A | R | O | N | G | S | T | K | E | G | Y | E | A |   |
| 3. Basilisk  | E   | L   | E   | L   | Y   | G   | G   | L | Q | Q | K | M | H | D | Y | L | D | E | D | Y | H | A | L | V | C | T | Y | L | G | L | A | N | Q | I | G | F | T | P | E | E | I | V | A | A | Y | L | E | K | N | K | E | N | F | A | R | O | N | G | S | T | K | E | G | Y | E | A |   |
| 4. v_B-Bak1  | E   | L   | E   | L   | Y   | G   | G   | L | Q | Q | K | M | H | D | Y | L | D | E | D | Y | H | A | L | V | C | T | Y | L | G | L | A | N | Q | I | G | F | T | P | E | E | I | V | A | A | Y | L | E | K | N | K | E | N | F | A | R | O | N | G | S | T | K | E | G | Y | E | A |   |
| 5. v_B-Bak6  | E   | L   | E   | L   | Y   | G   | G   | L | Q | Q | K | M | H | D | Y | L | D | E | D | Y | H | A | L | V | C | T | Y | L | G | L | A | N | Q | I | G | F | T | P | E | E | I | V | A | A | Y | L | E | K | N | K | E | N | F | A | R | O | N | G | S | T | K | E | G | Y | E | A |   |
